# Supplementary material for: Microcystin-LR Detected in a Low Molecular Weight Fraction from a Crude Extract of Zoanthus sociatus
Source: MDPI journal article supplement (doi:10.3390/toxins9030089), 2017-03-01
Supplement: s1 [file s1]

# Supplementary Materials: Microcystin-LR Detected in a Low Molecular Weight Fraction from a Crude Extract of *Zoanthus sociatus*

Dany Domínguez-Pérez, Armando Alexei Rodríguez, Hugo Osorio, Joana Azevedo, Olga Castañeda, Vítor Vasconcelos and Agostinho Antunes

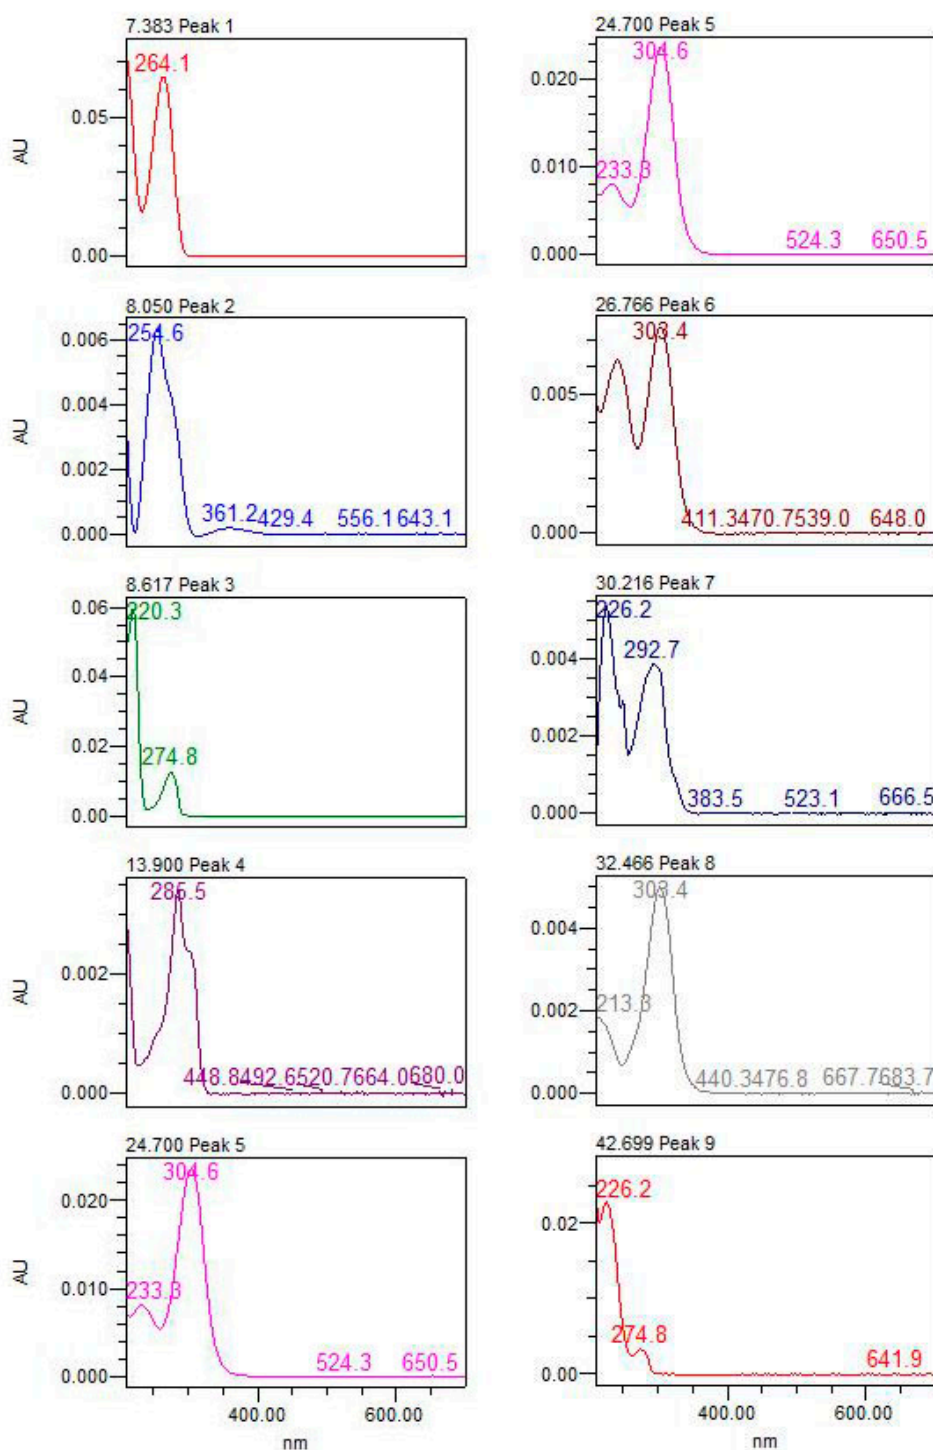

**Figure S1.** The figure shows the UV spectra of peaks obtained from the RP-HPLC analytical profile of fraction ZsG50-III. The maximum UV absorbance is variable within all peaks, within should be appreciated some peptides with UV spectra at 220–280, while another showed UV maximum at 233–304 nm.

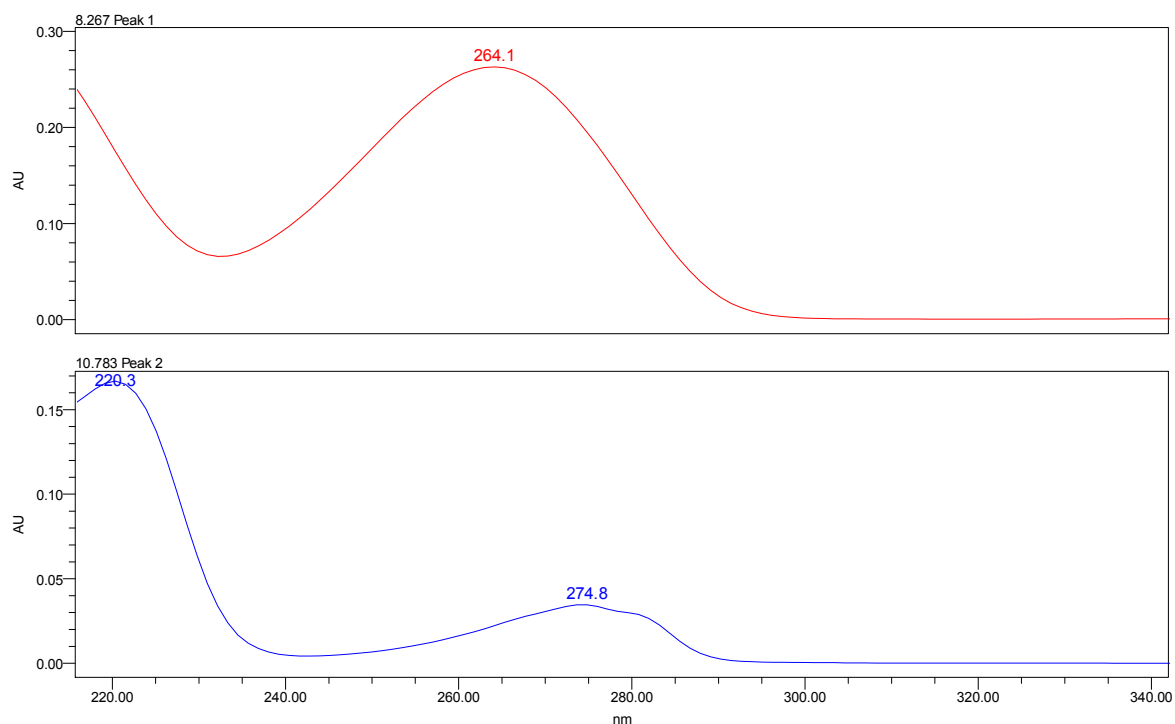

**Figure S2.** The figure shows the UV spectra of two peaks obtained from the RP-HPLC of the fraction ZsG50-III in a semi-preparative mode. The UV spectra showed maximum absorbance at 264 nm for peak 1, while UV maximum absorbance was 220–280 nm for peak 2.

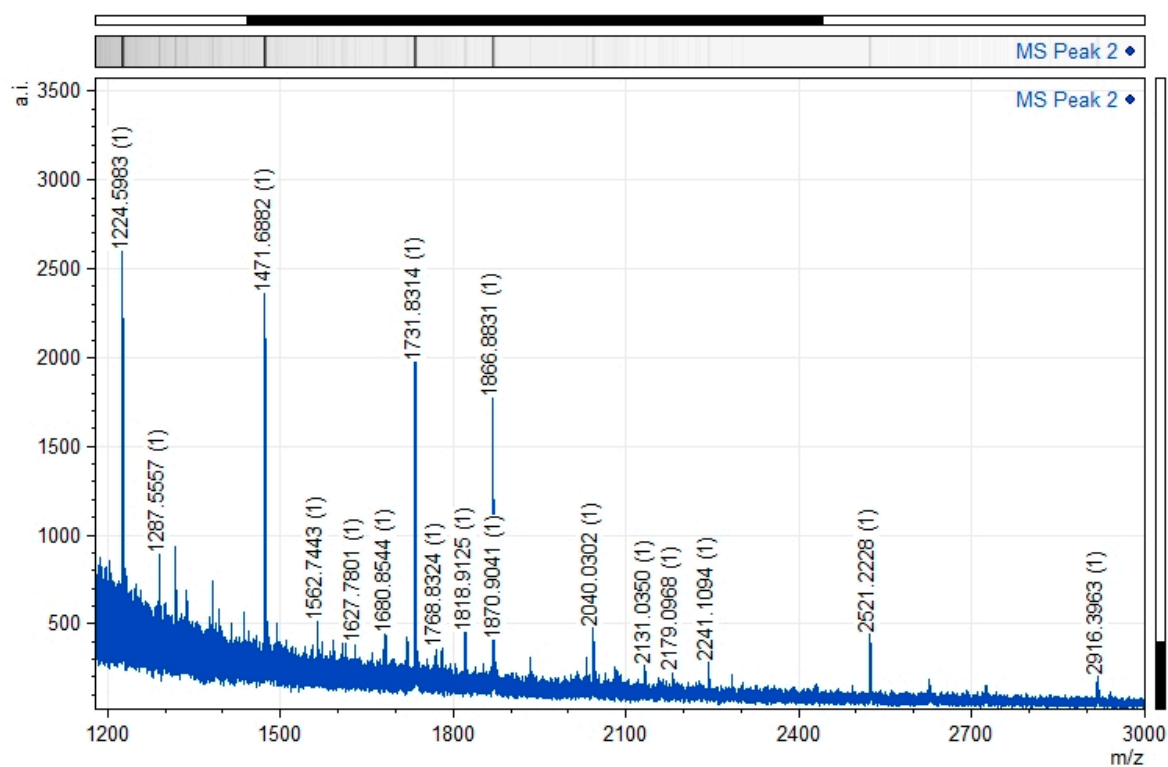

**Figure S3.** Matrix assisted laser desorption/ionization time-of-fly/time-of-fly (MALDI-TOF/TOF) mass spectra (MS) of the RP-HPLC peak 2. The MS spectra show absolute ion intensity (a.i) versus monoisotopic  $m/z$  value ( $m/z$ ) of each peak 2 in a mass range from  $m/z$  1180 to 3000.
